# Supplementary material for: Facile synthesis of mesoporous polymeric carbon nitride nanosheets anchored by Pt with ultralow loading for high-efficiency photocatalytic H2 evolution
Source: Royal Society of Chemistry journal article supplement (doi:10.1039/d1dt03554a), 2021-11-30
Supplement: d1dt03554a1.pdf [file d1dt03554a1.pdf]

# Facile synthesis of mesoporous polymeric carbon nitride nanosheets anchored by Pt with ultralow loading for high-efficiency photocatalytic H<sub>2</sub> evolution

Siyuan Ye,<sup>a</sup> Changsheng Su,<sup>b</sup> Lili He,<sup>c</sup> Mengli Li,<sup>\*a</sup> Zheng Yan,<sup>a</sup> Jun Wu,<sup>d</sup> Hongxia Shen,<sup>\*a</sup> Xuebo Cao<sup>\*a</sup>

<sup>a</sup>College of Biological, Chemical Sciences and Engineering, Jiaxing University, 118 Jiahang Road, Jiaxing 314001, PR China

<sup>b</sup>Department of Chemical and Biomolecular Engineering, University of Notre Dame, IN 46556, USA

<sup>c</sup>Graduate School of St. Paul University Philippines

<sup>d</sup>Jiaxing Nanhu University, Jiaxing, Zhejiang 314001, PR China

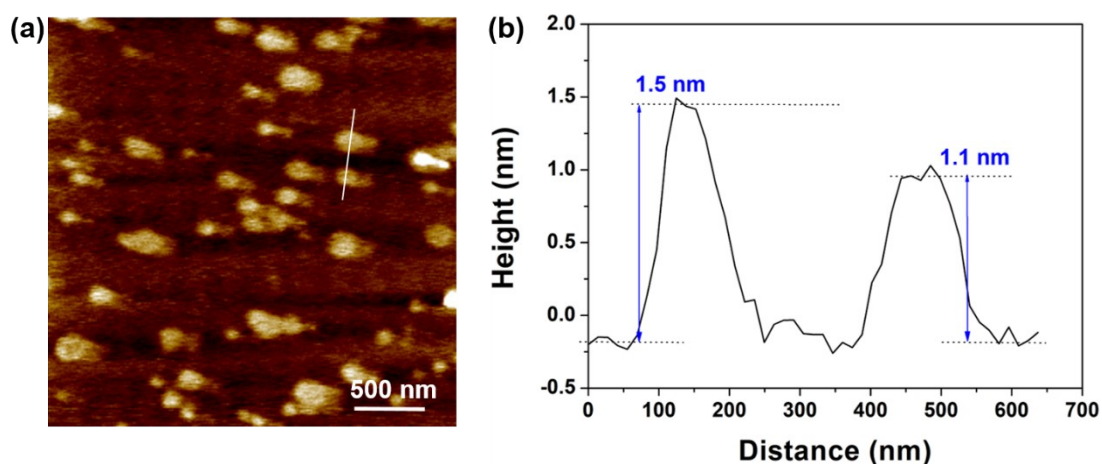

**Fig. S1** (a) AFM image and (b) corresponding height profiles along the white line in figure (a) of CNNS.

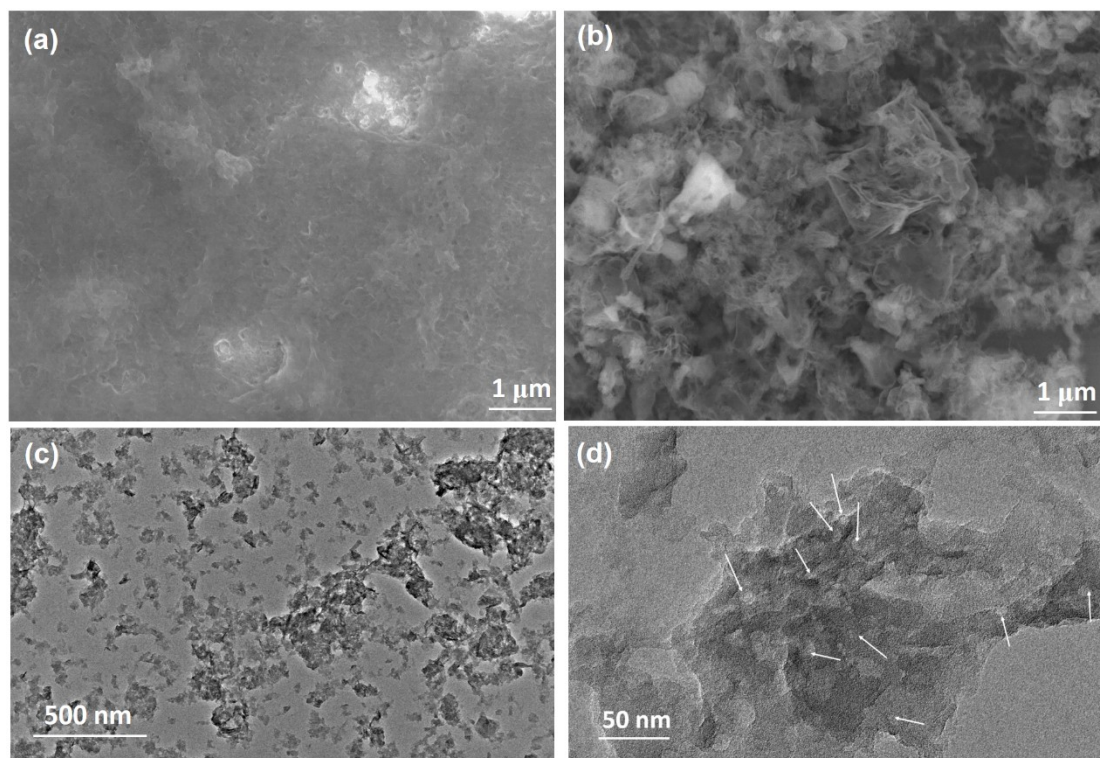

**Fig. S2** SEM images of (a) bulk CNU, (b) CNNSu, and TEM images of CNNSu (c, d)

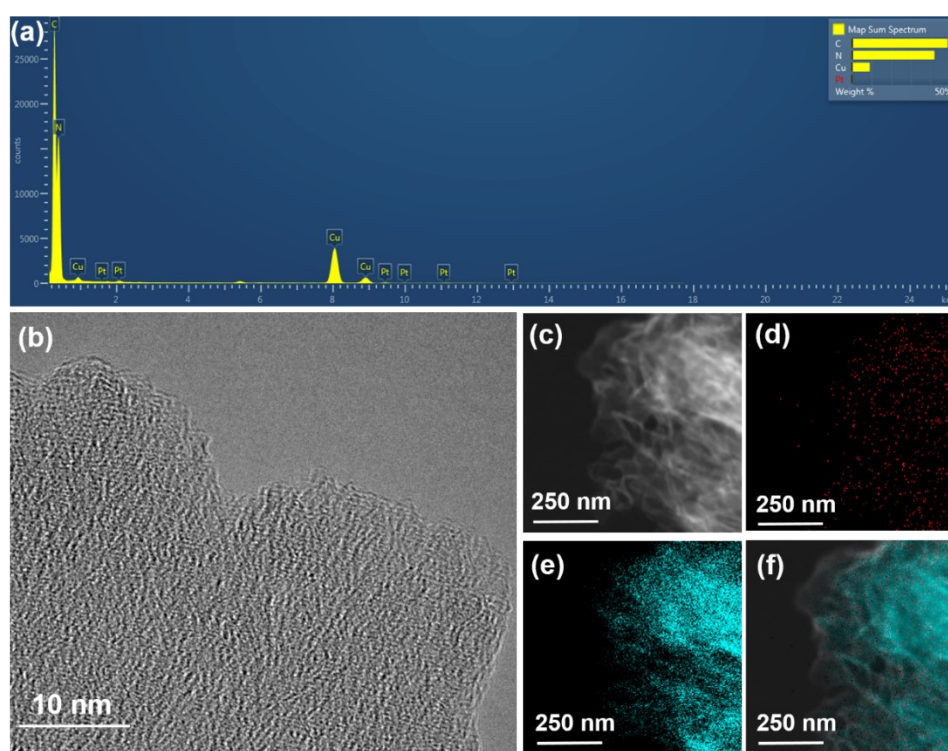

**Fig. S3** (a) Energy dispersive spectrum, (b) high-resolution TEM and (c) TEM image of Pt/CNNS-5H ( $\text{H}_2\text{PtCl}_6 \cdot 6\text{H}_2\text{O}$  solution: 1mL) and its (d) Pt, (e) N and (f) Pt, N merged element mappings.

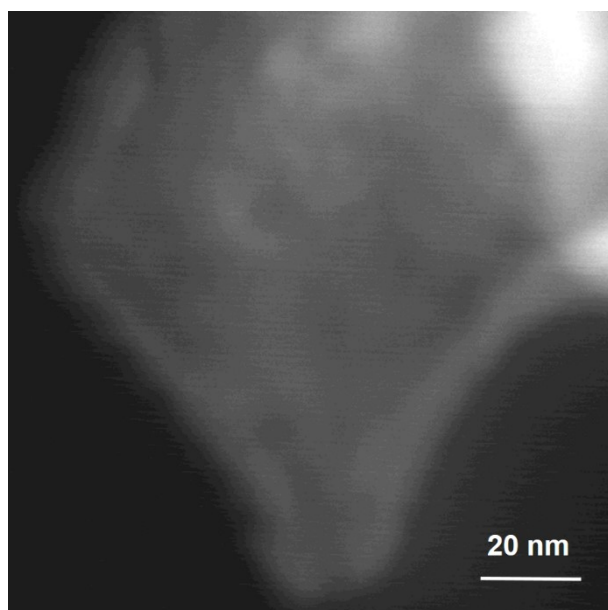

**Fig. S4** STEM image of Pt/CNNS-5H ( $\text{H}_2\text{PtCl}_6 \cdot 6\text{H}_2\text{O}$  solution: 1mL).

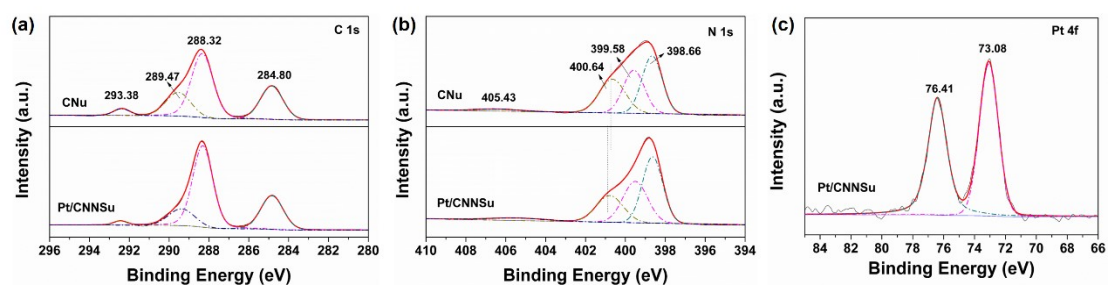

**Fig. S5** High-resolution XPS of (a) C 1s, (b) N 1s, and (c) Pt 4f in CNU and CNNSu as-obtained samples.

**Table S1** Physicochemical properties and photocatalytic activities of the CN and CNNS samples for H<sub>2</sub> evolution reduction under visible light.

| Sample    | Specified surface area (m <sup>2</sup> /g) | Binding energy (eV) | H <sub>2</sub> resolution (μmol/h) |
|-----------|--------------------------------------------|---------------------|------------------------------------|
| CN        | 9.96                                       | 2.76                | 16.1                               |
| CNNS-2.5H | 61.63                                      | 2.77                | 118.68                             |
| CNNS-5H   | 91.77                                      | 2.83                | 172.79                             |
| CNNS-10   | 80.60                                      | 2.86                | 150.28                             |
| CNNS-15   | 64.02                                      | 2.88                | 97.24                              |

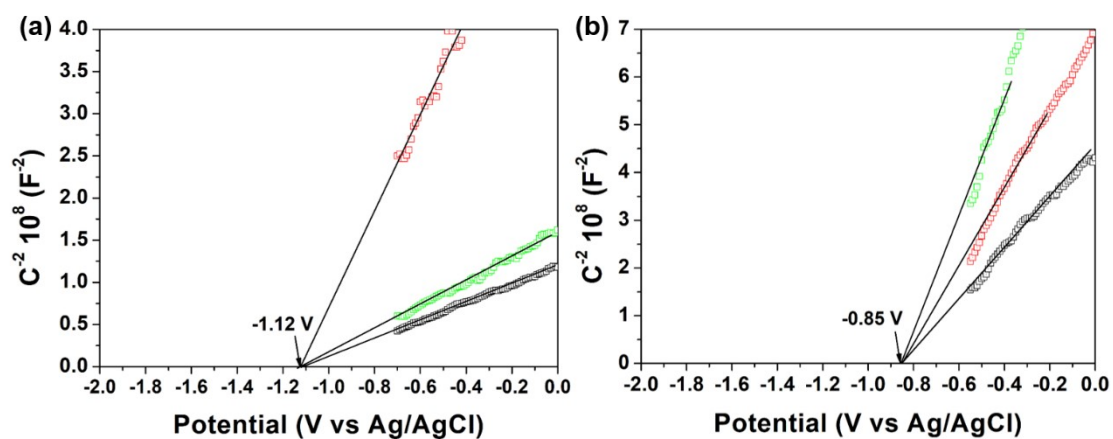

**Fig. S6** Mott-Schottky plots of CN (a) and CNNS-5H (b) collected at various frequencies<sup>1</sup> versus saturated Ag/AgCl reference electrode

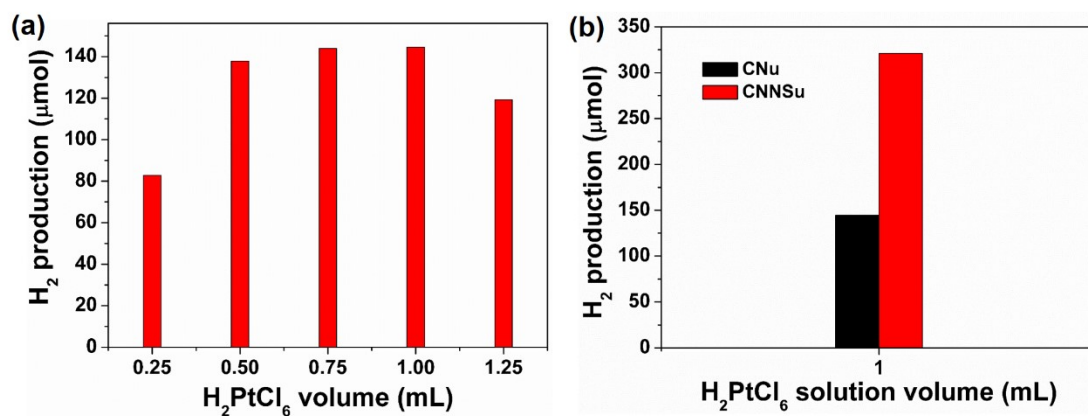

**Fig. S7** (a) H<sub>2</sub> evolution rate under visible light irradiation over CNU with varied H<sub>2</sub>PtCl<sub>6</sub>·6H<sub>2</sub>O solution (2 mg/mL in H<sub>2</sub>O) addition, (b) H<sub>2</sub> yield rate under visible light irradiation over CNU and CNNSu with Pt as cocatalyst (Pt content, 0.28 wt%).

**Table S2** Comparison of hydrogen evolution rate on the basis of co-catalyst Pt under visible light irradiation.

| Catalyst                                             | Light Source                           | Cocatalyst<br>(wt%)  | H <sub>2</sub> evolution rate | H <sub>2</sub> evolution rate | References |
|------------------------------------------------------|----------------------------------------|----------------------|-------------------------------|-------------------------------|------------|
|                                                      |                                        |                      | ( $\mu\text{mol/g/h}$ )       | ( $\text{mmol/g/h, per Pt}$ ) |            |
| CNNS                                                 | 300 W Xe lamp                          | Pt, 0.23             | 3455.8 ( $\lambda > 400$ nm)  | 1502.5 ( $\lambda > 400$ nm)  | This work  |
|                                                      |                                        |                      | 1888.4 ( $\lambda > 420$ nm)  | 821.0 ( $\lambda > 420$ nm)   |            |
| CNNSu                                                | 300 W Xe lamp                          | Pt, 0.28             | 6412 ( $\lambda > 400$ nm)    | 2290 ( $\lambda > 400$ nm)    | This work  |
|                                                      |                                        |                      | 3379 ( $\lambda > 420$ nm)    | 1206.8 ( $\lambda > 420$ nm)  |            |
| Atomically thin CNNS                                 | 300 W Xe lamp<br>( $\lambda > 420$ nm) | Pt, 3                | 3809.6                        | 126.99                        | [2]        |
| g-C <sub>3</sub> N <sub>4</sub>                      | AM 1.5                                 | Pt (II), 0.24        | 138                           | 57.5                          | [3]        |
| g-C <sub>3</sub> N <sub>4</sub>                      | 300 W Xe lamp                          | Pt single atom, 0.91 | 11472                         | 1260.6                        | [4]        |
| N-vacancy g-C <sub>3</sub> N <sub>4</sub>            | 300 W Xe lamp<br>( $\lambda > 420$ nm) | Pt single atom, 1.72 | 3020                          | 175.58                        | [5]        |
| MOF                                                  | 300 W Xe lamp<br>( $\lambda > 420$ nm) | Pt single atom, 12   | 11320                         | 94.3                          | [6]        |
| Defective ultra-thin g-C <sub>3</sub> N <sub>4</sub> | 300 W Xe lamp                          | Pt, 1                | 4300                          | 430                           | [7]        |
| Onion-ring g-C <sub>3</sub> N <sub>4</sub>           | 300 W Xe lamp<br>( $\lambda > 420$ nm) | Pt, 3                | 1900                          | 63.3                          | [8]        |

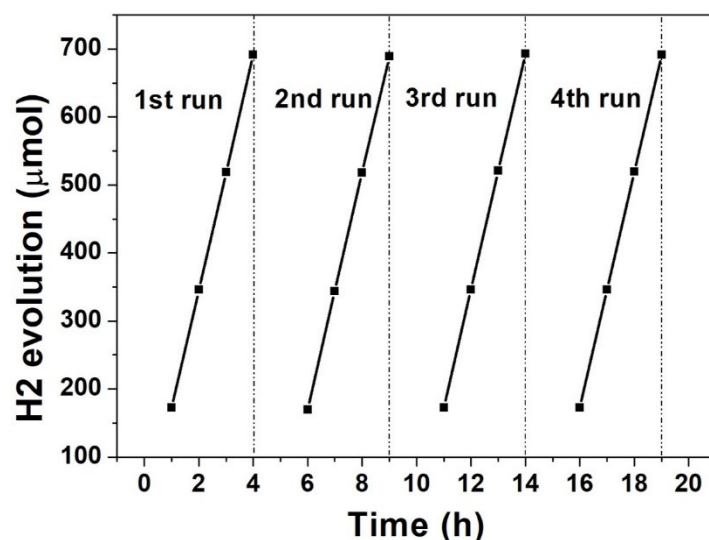

Fig. S8 Cycling runs for photostability test of photocatalytic H<sub>2</sub> evolution on CNNS-5H.

## References

- 1 Y. Xiao, G. Tian, W. Li, Y. Xie, B. Jiang, C. Tian, D. Zhao and H. Fu, *J. Am. Chem. Soc.*, 2019, **141**(6), 2508-2515.
- 2 Y. Wang, P. Du, H. Pan, L. Fu, Y. Zhang, J. Chen, N. Tang and G. Liu, *Adv. Mater.*, 2019, **31** (40), 1807540-1807547.
- 3 X. Zhou, Y. Liu, Z. Jin, M. Huang, F. Zhou, J. Song, J. Qu, Y. Zeng, P. Qian, W. Wong, *Adv. Sci.*, 2021, **8**, 2002465-2002473.
- 4 Y. Hu, Y. Qu, Y. Zhou, Z. Wang, H. Wang, B. Yang, Z. Yu, and Y. Wu, *Chem. Engin. J.*, **2021**, **412**, 128749-128757.
- 5 P. Zhou, F. Lv, N. Li, Y. Zhang, Z. Mu, Y. Tang, J. Lai, Y. Chao, M. Luo, F. Lin, J. Zhou, D. Su and S. Guo, *Nano Energy*, 2019, **56**, 127-137.
- 6 Q. Zuo, T. Liu, C. Chen, Y. Ji, X. Gong, Y. Mai and Y. Zhou, *Angew. Chem. Inter. Ed.*,

2019, **58** (30), 10198-10203.

7 C. Han, P. Su, B. Tan, X. Ma, H. Lv, C.Huang, P. Wang, Z. Tong, G. Li, Y. Huang and Z.

Liu, *J. Colloid Inter. Sci.*, 2021, **581**, 159-166.

8 L. Cui, J. Song, A.F. McGuire, S. Kang, X. Fang, J. Wang, C. Yin, X. Li, Y. Wang and B.

Cui, *ACS Nano*, 2018, **12**(6), 5551-5558.
